# Supplementary material for: On the reproduction of Li3Fe2(HPO3)3Cl—a short discussion on “Li3Fe2(HPO3)3Cl: an electroactive iron phosphite as a new polyanionic cathode material for Li-ion battery”
Source: Royal Society of Chemistry journal article supplement (doi:10.1039/c8ta07076h), 2019-01-01
Supplement: c8ta07076h1.pdf [file c8ta07076h1.pdf]

Electronic Supplementary Information

On the reproduction of  $\text{Li}_3\text{Fe}_2(\text{HPO}_3)_3\text{Cl}$ —a short discussion on  
“ $\text{Li}_3\text{Fe}_2(\text{HPO}_3)_3\text{Cl}$ : an electroactive iron phosphite as a new polyanionic  
cathode material for Li-ion battery”

Cheng-Long Yu,<sup>\*a</sup> Hang Liu,<sup>a</sup> Jie Song,<sup>a</sup> Jing Yang,<sup>a</sup> Huai-Bing Hui,<sup>a,b</sup> Hao Tang,<sup>a</sup> Dao-Yi Wang,<sup>a</sup>  
Peng-Cheng Zhang<sup>a</sup> and Xin-Meng Zhang<sup>a</sup>

<sup>a</sup>School of Materials Science and Engineering, Shaanxi University of Science & Technology,  
Xi'an 710021, China. \*E-mail: johnyucl@aliyun.com; Fax: +86-29-86168688; Tel: +86-29-  
86168688

<sup>b</sup>Dongfeng Motor Group Company Limited, Wuhan 442003, China

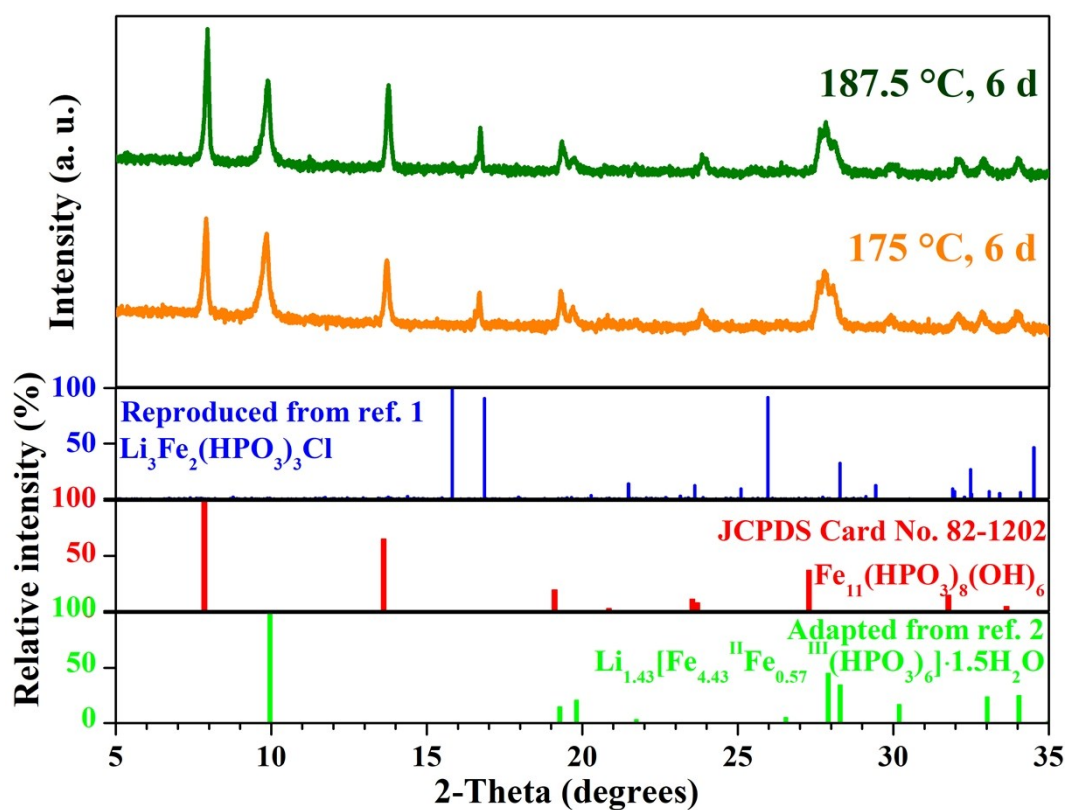

Fig. S1 The zoom-in XRD patterns of the particles synthesized by hydrothermal reaction at 175 °C and 187.5 °C for 6 days<sup>3</sup>

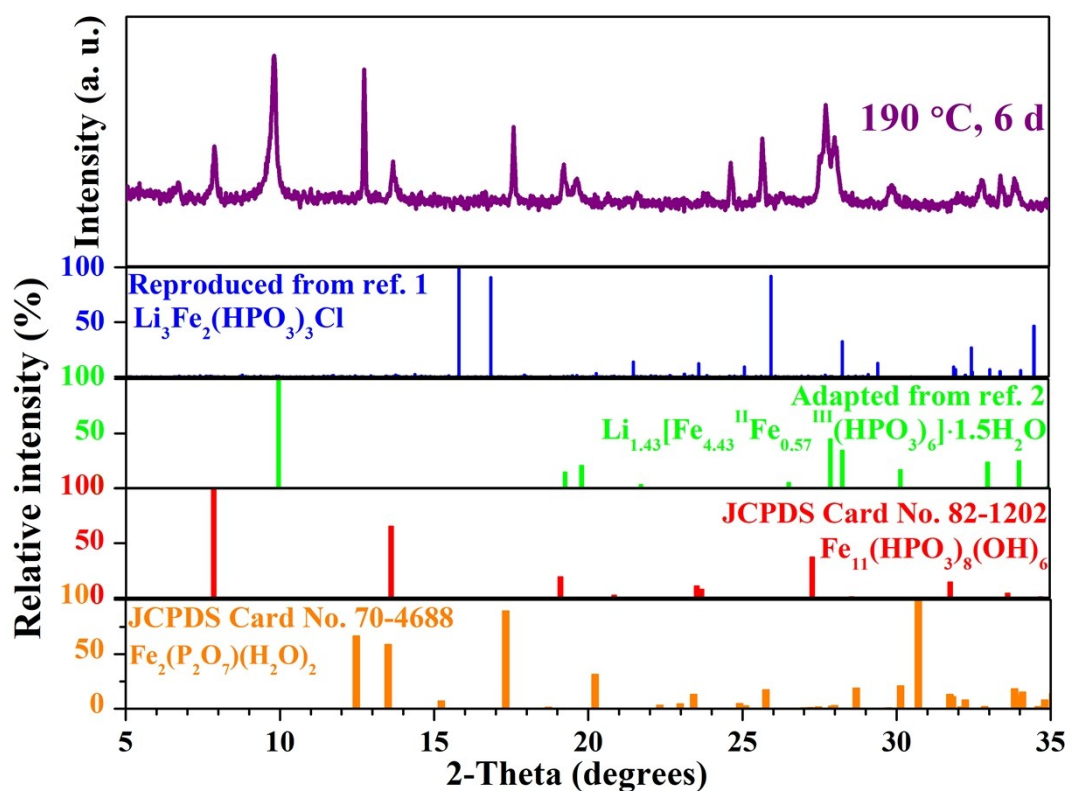

Fig. S2 The zoom-in XRD patterns of the particles synthesized by hydrothermal reaction at 190 °C for 6 days<sup>3</sup>
